# Supplementary material for: Copy Number Variation of the PIGY Gene in Sheep and Its Association Analysis with Growth Traits
Source: PubMed Central journal article supplement (PMC7222781; doi:10.3390/ani10040688), 2020-04-15
Supplement: animals-10-00688-s001.pdf [file animals-10-00688-s001.pdf]

Article

# Supplementary Material: Copy Number Variation of the *PIGY* Gene in Sheep and Its Association Analysis with Growth Traits

Ziting Feng <sup>1</sup>, Xinyu Li <sup>1</sup>, Jie Cheng <sup>1</sup>, Rui Jiang <sup>1</sup>, Ruolan Huang <sup>1</sup>, Dingchuan Wang <sup>1</sup>, Yongzhen Huang <sup>1</sup>, Li Pi <sup>2</sup>, Linyong Hu <sup>2</sup> and Hong Chen <sup>\*</sup>

**Table S1.** The minimum value, mean value (SD) and maximum value of body size traits in three sheep.

| Breeds | Body Size Traits         | Min Value | Mean Value (SD)    | Max Value |
|--------|--------------------------|-----------|--------------------|-----------|
| CKS    | body weight (kg)         | 29.10     | 58.05 (SD = 13.24) | 101.53    |
|        | body height (cm)         | 52        | 65.99 (SD = 3.69)  | 85        |
|        | body length (cm)         | 50        | 72.00 (SD = 6.87)  | 92        |
|        | chest circumference (cm) | 67        | 81.62 (SD = 8.45)  | 111       |
| HS     | body weight (kg)         | 21.7      | 32.29 (SD = 4.54)  | 46.6      |
|        | body length (cm)         | 62        | 70.87 (SD = 3.85)  | 81        |
|        | chest circumference (cm) | 65        | 76.76 (SD = 4.49)  | 90        |
|        | tube circumference (cm)  | 5         | 7.11 (SD = 0.55)   | 8.5       |
|        | body height (cm)         | 54.5      | 61.81 (SD = 3.71)  | 72        |
|        | rump width (cm)          | 14        | 17.44 (SD = 1.14)  | 20        |
| STHS   | chest deep (cm)          | 22        | 27.63 (SD = 2.62)  | 37.5      |
|        | tube circumference (cm)  | 5         | 7.17 (SD = 0.74)   | 8.8       |
|        | height at hip cross (cm) | 53        | 62.89 (SD = 4.26)  | 74        |
|        | chest width (cm)         | 12.8      | 19.50 (SD = 3.42)  | 29        |
|        | chest circumference (cm) | 59        | 72.08 (SD = 5.99)  | 91        |
|        | body height (cm)         | 51.5      | 63.28 (SD = 4.24)  | 74        |
|        | body length (cm)         | 40.5      | 59.05 (SD = 6.24)  | 74        |

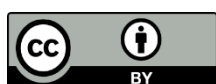

© 2020 by the authors. Licensee MDPI, Basel, Switzerland. This article is an open access article distributed under the terms and conditions of the Creative Commons Attribution (CC BY) license (<http://creativecommons.org/licenses/by/4.0/>).
